# Supplementary material
Source: Springer Nature journal article supplement (https://www.springermedizin.de/resource/supplementary/12874_2012_984_MOESM4_ESM.pdf/9432982)
Supplement: MOESM4 [file 9432982]

|                              | Selected individuals                                                                                                                   | Total population                                                                                 |
|------------------------------|----------------------------------------------------------------------------------------------------------------------------------------|--------------------------------------------------------------------------------------------------|
| Observational studies        | <p><b>A.</b></p> <pre>graph TD; C --&gt; E; C --&gt; D; E --&gt; D; E --&gt; S; D --&gt; S; style S stroke:#000,stroke-width:2px</pre> | <p><b>B.</b></p> <pre>graph TD; C --&gt; E; C --&gt; D; E --&gt; D; E --&gt; S; D --&gt; S</pre> |
| Randomized controlled trials | <p><b>C.</b></p> <pre>graph TD; C --&gt; D; E --&gt; D; E --&gt; S; D --&gt; S; style S stroke:#000,stroke-width:2px</pre>             | <p><b>D.</b></p> <pre>graph TD; C --&gt; D; E --&gt; D; E --&gt; S; D --&gt; S</pre>             |
